# Supplementary material for: Risk Factors for Chronic Diseases and Multimorbidity in a Primary Care Context of Central Argentina: A Web-Based Interactive and Cross-Sectional Study
Source: PubMed Central journal article supplement (PMC5369087; doi:10.3390/ijerph14030251), 2017-03-02
Supplement: ijerph-14-00251-s001.pdf [file ijerph-14-00251-s001.pdf]

## Risk Factors for Chronic Diseases and Multimorbidity in a Primary Care Context of Central Argentina: A Web-Based Interactive and Cross Sectional Study

Supplementary Table S1. Website access statistics

| Pages                        | Number of visits | Average minutes duration |
|------------------------------|------------------|--------------------------|
| Total                        | 8561             | 5:46                     |
| Results                      | 2436             | 1:24                     |
| Home                         | 1708             | 0:47                     |
| Laboratory and anthropometry | 1556             | 0:29                     |
| Problems with password       | 479              | 0:46                     |
| Blood glucose                | 395              | 0:39                     |
| About the research           | 294              | 0:43                     |
| Miscellaneous                | 259              | 0:34                     |
| Cholesterol                  | 246              | 0:58                     |
| Body Mass Index              | 217              | 1:00                     |
| Triglycerides                | 180              | 1:02                     |
| Contact                      | 164              | 1:12                     |

Risk Factors for Chronic Diseases and Multimorbidity in a Primary Care Context of Central Argentina: A Web-Based Interactive and Cross Sectional Study

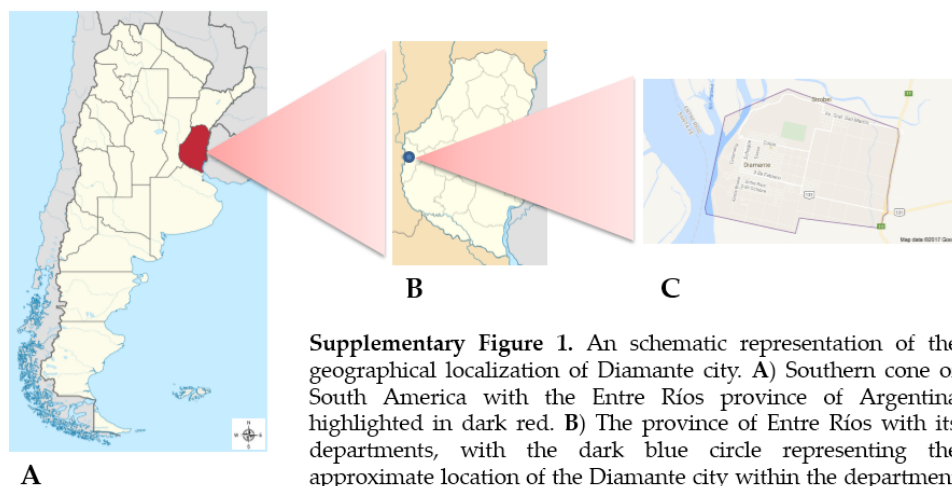

**Supplementary Figure 1.** An schematic representation of the geographical localization of Diamante city. **A)** Southern cone of South America with the Entre Ríos province of Argentina highlighted in dark red. **B)** The province of Entre Ríos with its departments, with the dark blue circle representing the approximate location of the Diamante city within the department of Diamante. **C)** The city of Diamante delimited.

Figure 1A. <https://commons.wikimedia.org/w/index.php?curid=17027807%3C>

Figure 1B. [https://es.wikipedia.org/wiki/Archivo:Argentina\\_Entre\\_R%C3%ADos\\_location\\_map.svg](https://es.wikipedia.org/wiki/Archivo:Argentina_Entre_R%C3%ADos_location_map.svg)

Figure 1C. <https://www.google.com.ar/maps/place/Diamante,+Entre+R%C3%ADos/@-32.2061915,-60.6338256,14921a,20y,43.18t/data=!3m1!1e3!4m5!3m4!1s0x95b5cda484c0de1b:0x708a22dff3fe8d55!8m2!3d-32.0697098!4d-60.6378708>

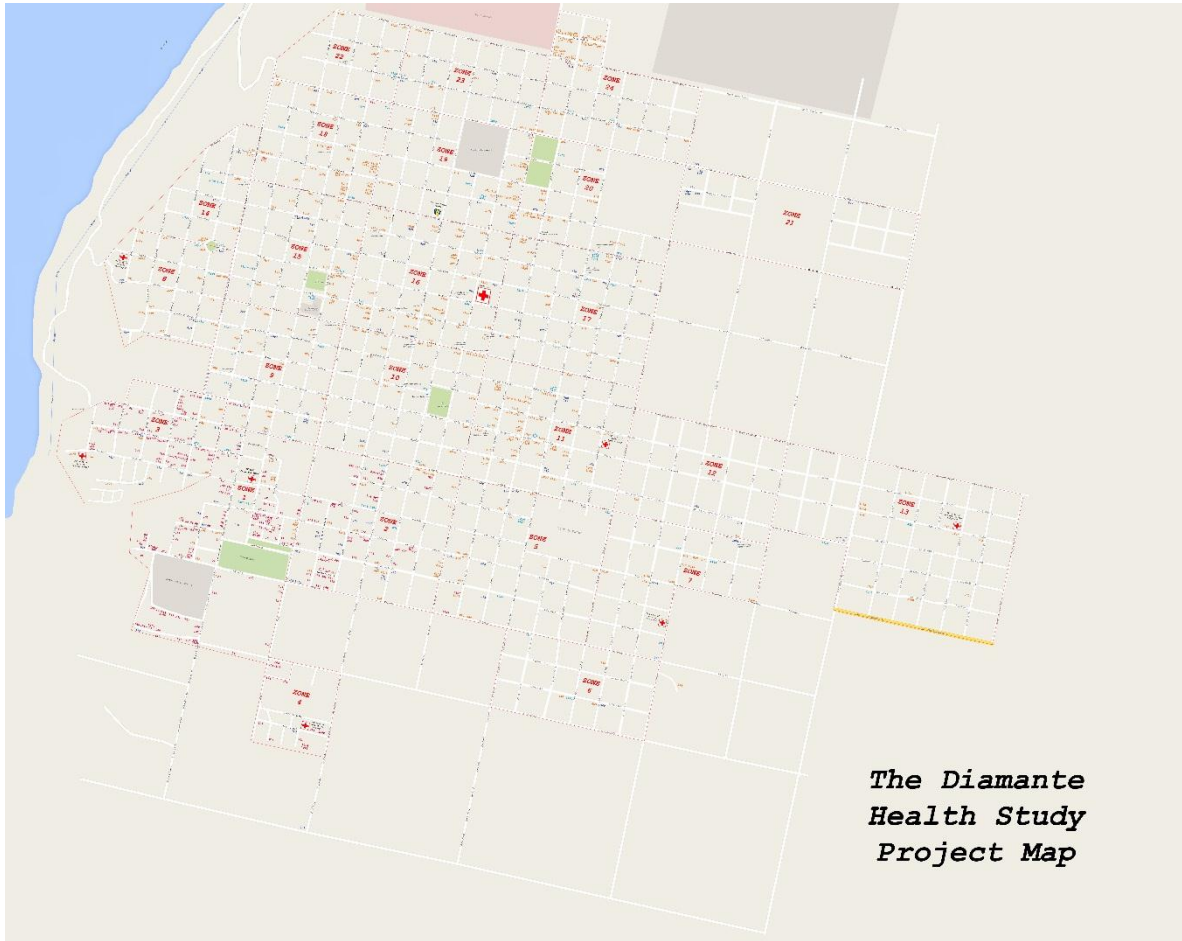

**Supplementary Figure 2.** The project map of the city of Diamante with the 24 studied zones delimited, and the distributions of participants with their individual code number throughout different areas of the city.
